# Supplementary material for: Interpreting the charge transfer to solvent state in the photoionization of potassium ferrocyanide in an aqueous solution
Source: Royal Society of Chemistry journal article supplement (doi:10.1039/d3nj04148d), 2024-01-01
Supplement: d3nj04148d1.pdf [file d3nj04148d1.pdf]

Electronic Supplementary Information

## **Interpreting the Charge Transfer to Solvent State in**

### **Photoionization of Potassium ferrocyanide in Aqueous Solution**

Zhijian Hu<sup>a,b</sup>, Songqiu Yang<sup>\*b,c</sup>, Yan Zhang<sup>a</sup>, Huaxin Liu<sup>a,b</sup>, Hongming Yin<sup>a</sup>, Jianyong Liu<sup>b,c</sup>

a, School of Science, Dalian Maritime University, Linghai Road 1, Dalian 116026, P. R. China

b, State Key Laboratory of Molecular Reaction Dynamics, Dalian Institute of Chemical Physics, Chinese Academy of Sciences, Zhongshan Road 457, Dalian 116023, P. R. China

c, University of Chinese Academy of Sciences, No.1 Yanqihu East Rd, Huairou District, Beijing 101408, P. R. China

\*Corresponding author e-mail: sqyang@dicp.ac.cn

**Content:****Figures:**

Figure S1. The relevant molecular orbitals of ferrocyanide (the geometry was optimized in the gas phase) are shown. The PBE0 functional is used, with the Fe atom using the SDD pseudopotential basis set while C and N use the 6-31G(d) basis set. The isosurface level is 0.010.

Figure S2. The first 5ps potential energy curve is from a Molecular Dynamics simulation of the 15.65-angstrom box with 120 water molecules and one potassium ferrocyanide molecule at NVT and 298.15 K.

Figure S3. The radial distribution function of Fe-O is shown.

Figure S4. Some important orbitals of potassium ferrocyanide in a periodic box under an explicit water model, in which the  $[\text{Fe}(\text{CN})_6]^{4-}$  ion is highlighted with a cyan color.

**Tables:**

Table S1. The vertical excited energies of the optimized geometry of ferrocyanide were calculated using an implicit model. The PBE0 functional is used, with the Fe atom using the SDD pseudopotential basis set while C and N use the 6-311+G(d) basis set. Where H represents the highest occupied molecular orbital (HOMO), L represents the lowest unoccupied molecular orbital (LUMO), and f represents the oscillator strength.

Table S2. The vertical excited energies of the lowest 15 excited states of ferrocyanide (in the gas phase) are shown. The PBE0 functional is used, with the Fe atom using the SDD pseudopotential basis set while C and N use the 6-31G(d) basis set. Where H represents the highest occupied molecular orbital (HOMO), L represents the lowest unoccupied molecular orbital (LUMO), and f represents the oscillator strength.

Table S3. Natural Transient Orbital (NTO) pairs of the lowest 10 excited states of ferrocyanide in the implicit model. The isosurface level for the unoccupied NTOs of S7-S10 was 0.010, while the isosurface level for the other orbitals was 0.020.

Table S4. The bond lengths and angles of the optimized geometry of ferrocyanide in a periodic water box.

Table S5. The vertical excited energies were calculated for the optimized geometry of a periodic box containing 120 water molecules and one  $\text{K}_4\text{Fe}(\text{CN})_6$  molecule. Where H represents the highest occupied molecular orbital (HOMO), L represents the lowest unoccupied molecular orbital (LUMO), and f represents the oscillator strength.

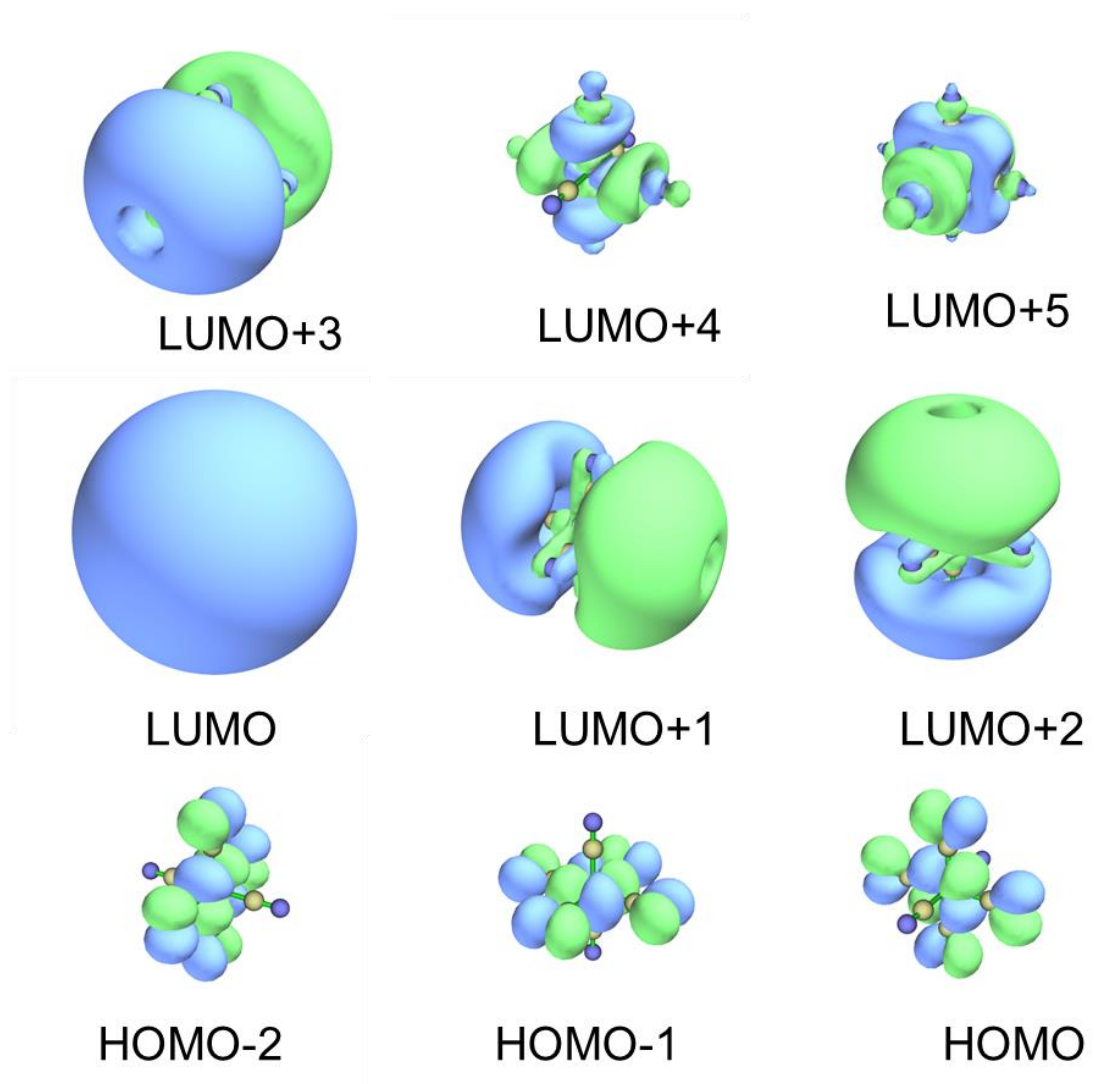

Figure S1. The relevant molecular orbitals of ferrocyanide (the geometry was optimized in the gas phase) are shown. The PBE0 functional is used, with the Fe atom using the SDD pseudopotential basis set while C and N use the 6-31G(d) basis set. The isosurface level is 0.010.

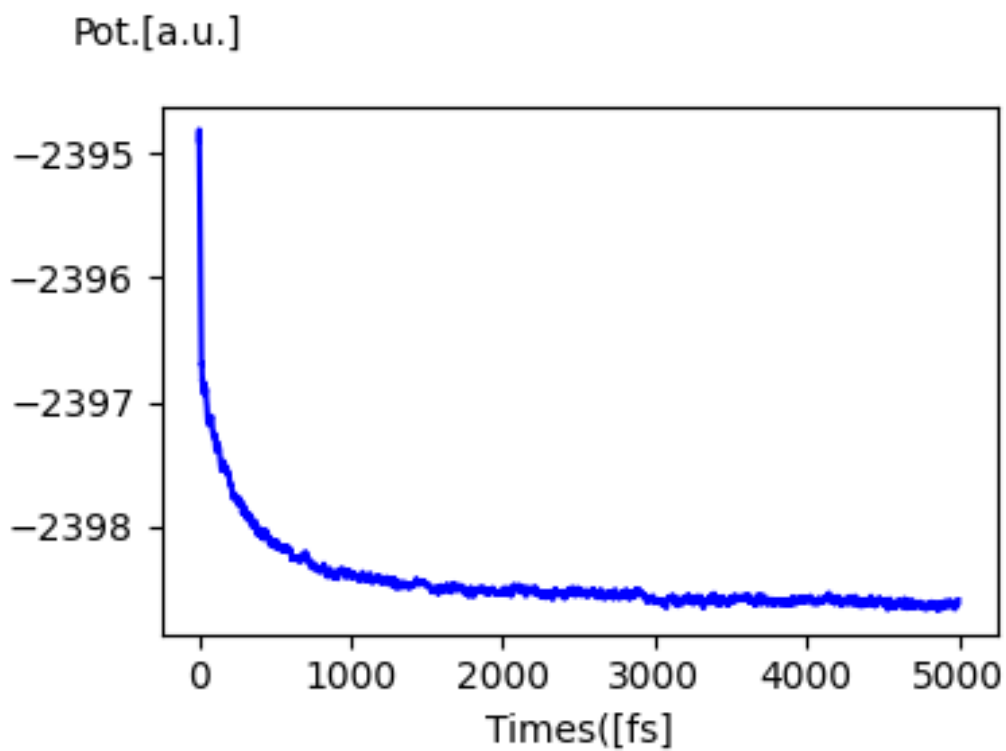

Figure S2. The first 5ps potential energy curve is from a Molecular Dynamics simulation of the 15.65-angstrom box with 120 water molecules and one potassium ferrocyanide molecule at NVT and 298.15 K.

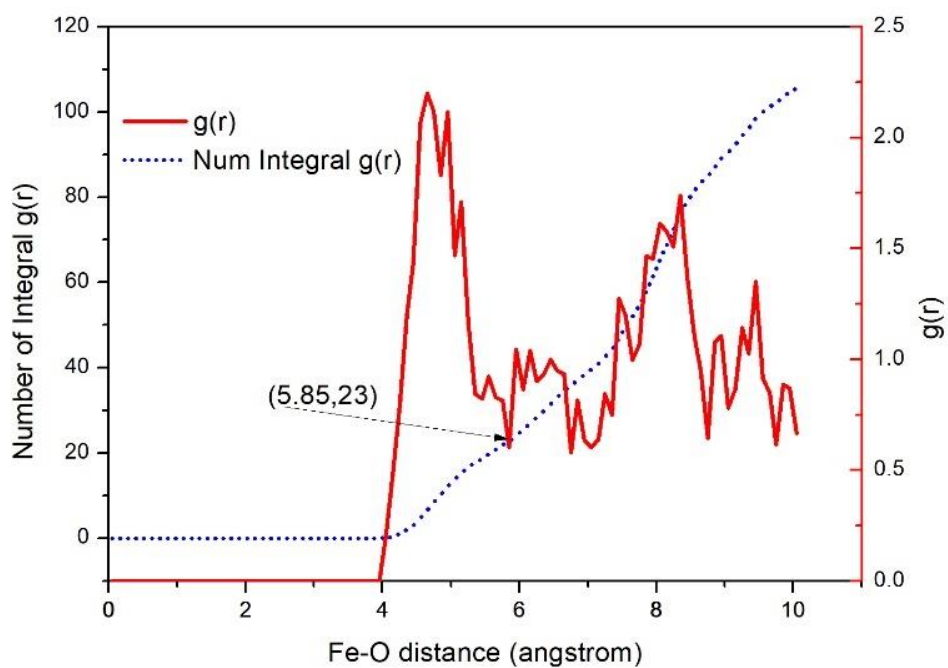

Figure S3. The radial distribution function of Fe-O is shown.

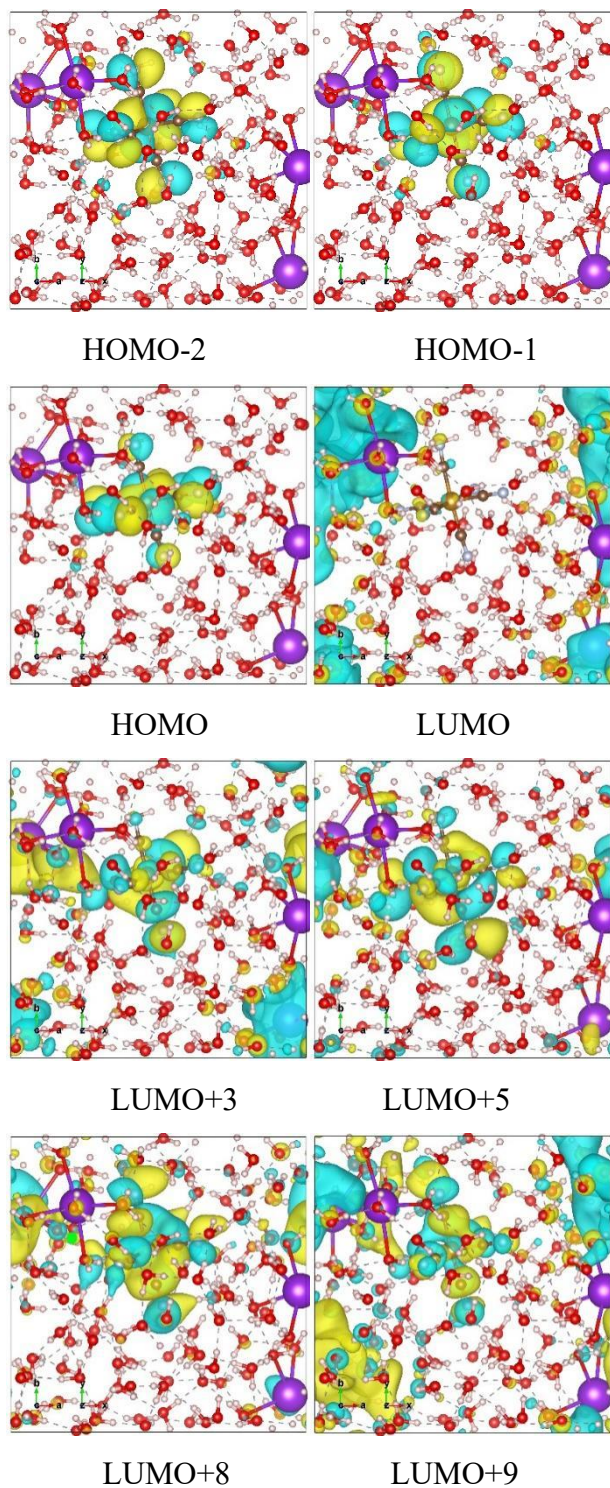

Figure S4. Some important orbitals of potassium ferrocyanide in a periodic box under an explicit water model, in which the  $[\text{Fe}(\text{CN})_6]^{4-}$  ion is highlighted with a cyan color.

Table S1. The vertical excited energies of the optimized geometry of ferrocyanide were calculated using an implicit model. The PBE0 functional is used, with the Fe atom using the SDD pseudopotential basis set while C and N use the 6-311+G(d) basis set. Where H represents the highest occupied molecular orbital (HOMO), L represents the lowest unoccupied molecular orbital (LUMO), and f represents the oscillator strength.

| State | excited energy (eV) | wavelength (nm) | f      | MOs                                                                              |
|-------|---------------------|-----------------|--------|----------------------------------------------------------------------------------|
| 1     | 3.6578              | 338.96          | 0      | H-2 -> L+16 49.7%,<br>H-2 -> L+4 20.5%,<br>H-2 -> L+17 20.4%                     |
| 2     | 3.6578              | 338.96          | 0      | H-1 -> L+17 70.0%,<br>H-1 -> L+5 25.0%                                           |
| 3     | 3.6578              | 338.96          | 0      | H -> L+16 55.3%,<br>H -> L+4 17.0%,<br>H -> L+17 14.8%,<br>H -> L+5 8.1%         |
| 4     | 4.3465              | 285.25          | 0      | H-2 -> L+17 42.7%,<br>H-2 -> L+5 23.3%,<br>H-2 -> L+16 17.6%,<br>H-2 -> L+4 5.3% |
| 5     | 4.3465              | 285.25          | 0      | H-1 -> L+16 60.1%,<br>H-1 -> L+4 28.4%                                           |
| 6     | 4.3465              | 285.25          | 0      | H -> L+17 47.6%,<br>H -> L+5 19.4%,<br>H -> L+16 12.7%,<br>H -> L+4 9.2%         |
| 7     | 4.4034              | 281.56          | 0      | H-1 -> L 97.5%                                                                   |
| 8     | 4.4034              | 281.56          | 0      | H-2 -> L 97.5%                                                                   |
| 9     | 4.4034              | 281.56          | 0      | H -> L 97.5%                                                                     |
| 10    | 5.0661              | 244.73          | 0      | H -> L+1 49.7%,<br>H-1 -> L+3 49.7%                                              |
| 11    | 5.0661              | 244.73          | 0      | H -> L+2 49.7%,<br>H-2 -> L+3 49.7%                                              |
| 12    | 5.0661              | 244.73          | 0      | H-1 -> L+2 49.7%,<br>H-2 -> L+1 49.7%                                            |
| 13    | 5.0714              | 244.48          | 0.0673 | H -> L+2 49.7%,<br>H-2 -> L+3 49.7%                                              |
| 14    | 5.0714              | 244.48          | 0.0673 | H-1 -> L+2 49.7%,<br>H-2 -> L+1 49.7%                                            |
| 15    | 5.0714              | 244.48          | 0.0673 | H -> L+1 49.7%,<br>H-1 -> L+3 49.7%                                              |

|    |        |        |   |                                                                                  |
|----|--------|--------|---|----------------------------------------------------------------------------------|
| 16 | 5.0765 | 244.23 | 0 | H -> L+3 33.1%,<br>H-1 -> L+1 33.1%,<br>H-2 -> L+2 33.1%                         |
| 17 | 5.091  | 243.54 | 0 | H-2 -> L+2 63.2%,<br>H-1 -> L+1 30.2%,<br>H -> L+3 6.0%                          |
| 18 | 5.091  | 243.54 | 0 | H -> L+3 60.3%,<br>H-1 -> L+1 36.1%                                              |
| 19 | 5.4337 | 228.18 | 0 | H-2 -> L+9 45.4%,<br>H-1 -> L+8 45.4%                                            |
| 20 | 5.4337 | 228.18 | 0 | H-2 -> L+7 45.4%,<br>H -> L+8 45.4%                                              |
| 21 | 5.4337 | 228.18 | 0 | H-1 -> L+7 45.4%,<br>H -> L+9 45.4%                                              |
| 22 | 5.6356 | 220    | 0 | H-2 -> L+8 59.4%,<br>H -> L+7 23.4%,<br>H-1 -> L+9 8.2%                          |
| 23 | 5.6356 | 220    | 0 | H-1 -> L+9 52.5%,<br>H -> L+7 37.3%                                              |
| 24 | 5.7588 | 215.3  | 0 | H-1 -> L+7 40.1%,<br>H -> L+9 40.1%,<br>H-2 -> L+5 9.6%                          |
| 25 | 5.7588 | 215.3  | 0 | H-2 -> L+9 40.1%,<br>H-1 -> L+8 40.1%,<br>H -> L+5 8.0%                          |
| 26 | 5.7588 | 215.3  | 0 | H-2 -> L+7 40.1%,<br>H -> L+8 40.1%,<br>H-1 -> L+4 11.8%                         |
| 27 | 5.9291 | 209.11 | 0 | H-1 -> L+6 96.7%                                                                 |
| 28 | 5.9291 | 209.11 | 0 | H-2 -> L+6 96.7%                                                                 |
| 29 | 5.9291 | 209.11 | 0 | H -> L+6 96.7%                                                                   |
| 30 | 6.1075 | 203    | 0 | H-2 -> L+4 59.8%,<br>H-2 -> L+16 17.0%,<br>H-2 -> L+5 13.6%,<br>H-2 -> L+17 7.0% |



Table S2. The vertical excited energies of the lowest 15 excited states of ferrocyanide (in the gas phase) are shown. The PBE0 functional is used, with the Fe atom using the SDD pseudopotential basis set while C and N use the 6-31G(d) basis set. Where H represents the highest occupied molecular orbital (HOMO), L represents the lowest unoccupied molecular orbital (LUMO), and f represents the oscillator strength.

| State | excited energy (eV) | wavelength (nm) | f      | MOs                                   |
|-------|---------------------|-----------------|--------|---------------------------------------|
| 1     | 0.1203              | 10309           | 0      | H -> L 100%                           |
| 2     | 0.1203              | 10309           | 0      | H-1 -> L 100%                         |
| 3     | 0.1203              | 10309           | 0      | H-2 -> L 100%                         |
| 4     | 2.1475              | 577.34          | 0      | H-3 -> L 99.8%                        |
| 5     | 2.1475              | 577.34          | 0      | H-4 -> L 99.8%                        |
| 6     | 2.1475              | 577.34          | 0      | H-5 -> L 99.8%                        |
| 7     | 2.6605              | 466.02          | 0      | H-7 -> L 99.8%                        |
| 8     | 2.6605              | 466.02          | 0      | H-6 -> L 99.8%                        |
| 9     | 2.6605              | 466.02          | 0      | H-8 -> L 99.8%                        |
| 10    | 2.9297              | 423.2           | 0      | H-9 -> L 99.7%                        |
| 11    | 2.9297              | 423.2           | 0      | H-10 -> L 99.7%                       |
| 12    | 2.9297              | 423.2           | 0      | H-11 -> L 99.7%                       |
| 13    | 3.0615              | 404.98          | 0.0673 | H -> L+4 97.1%                        |
| 14    | 3.0615              | 404.98          | 0.0673 | H-1 -> L+5 72.8%,<br>H-1 -> L+4 24.3% |
| 15    | 3.0615              | 404.98          | 0.0673 | H-2 -> L+5 72.8%,<br>H-2 -> L+4 24.3% |

Table S3. Natural Transient Orbital (NTO) pairs of the lowest 10 excited states of ferrocyanide in the implicit model. The isosurface level for the unoccupied NTOs of S7-S10 was 0.010, while the isosurface level for the other orbitals was 0.020.

| State | Contributions % | Major NTOs                                                                          |                                                                                       |
|-------|-----------------|-------------------------------------------------------------------------------------|---------------------------------------------------------------------------------------|
|       |                 | Occupied                                                                            | Unoccupied                                                                            |
| S1    | 100             | 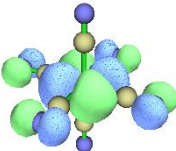   |    |
| S2    | 100             |    |    |
| S3    | 100             |   |   |
| S4    | 92.4            |  |  |
| S5    | 92.4            |  |  |
| S6    | 92.4            |  |  |

|            |             |                                                                                     |                                                                                       |
|------------|-------------|-------------------------------------------------------------------------------------|---------------------------------------------------------------------------------------|
| <b>S7</b>  | <b>99.8</b> | 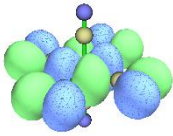   |    |
| <b>S8</b>  | <b>99.8</b> |    |    |
| <b>S9</b>  | <b>99.8</b> |    |    |
| <b>S10</b> | <b>49.9</b> |   |   |
|            | <b>49.9</b> |  |  |

Table S4. The bond lengths and angles of the optimized geometry of ferrocyanide in a periodic water box.

bond: length(angstrom)

Fe-C2:1.90380

Fe-C4:1.88966

Fe-C6:1.88293

Fe-C8:1.88192

Fe-C10:1.85864

Fe-C12:1.88852

C2-N3:1.17316

C4-N5:1.17717

C6-N7:1.17538

C8-N9:1.18210

C10-N11:1.18009

C12-N13:1.17862

Angle: (degree)

C2-Fe-C10:177.35669

C4-Fe-C8:176.93019

C6-Fe-C12:179.03693

C2-Fe-C8:91.23743

C2-Fe-C4:89.75422

Table S5. The vertical excited energies were calculated for the optimized geometry of a periodic box containing 120 water molecules and one  $K_4Fe(CN)_6$  molecule. Where H represents the highest occupied molecular orbital (HOMO), L represents the lowest unoccupied molecular orbital (LUMO), and f represents the oscillator strength.

| State | excited energy (eV) | wavelength (nm) | f        | MOs                                                                           |
|-------|---------------------|-----------------|----------|-------------------------------------------------------------------------------|
| 1     | 3.8195              | 324.61          | 0.00209  | H-1 -> L+8 9.7%,<br>H-1 -> L+6 9.1%,<br>H-2 -> L+8 7.2%,<br>H-1 -> L+3 5.2%   |
| 2     | 4.0538              | 305.85          | 4.80E-04 | H -> L+3 16.8%,<br>H -> L+20 14.6%,<br>H -> L+1 6.8%,<br>H -> L+12 5.1%       |
| 3     | 4.068               | 304.78          | 5.40E-04 | H-2 -> L+6 14.8%,<br>H-1 -> L+6 8.9%,<br>H-1 -> L+17 5.5%,<br>H-2 -> L+8 5.3% |
| 4     | 4.5193              | 274.35          | 0.00123  | H -> L+6 20.5%,<br>H-1 -> L+3 9.3%,<br>H-1 -> L+6 8.1%,<br>H -> L+17 6.3%     |
| 5     | 4.5335              | 273.49          | 2.80E-04 | H-1 -> L+3 12.9%,<br>H -> L+5 10.4%,<br>H -> L+6 8.4%,<br>H -> L+8 5.7%       |

|    |        |        |          |                                                                                |
|----|--------|--------|----------|--------------------------------------------------------------------------------|
| 6  | 4.7296 | 262.14 | 0.00127  | H-2 -> L+3 20.1%,<br>H-2 -> L+6 14.6%,<br>H-2 -> L+17 6.7%,<br>H-2 -> L+1 5.6% |
| 7  | 5.229  | 237.11 | 2.70E-04 | H -> L+5 32.3%,<br>H-1 -> L+3 8.6%,<br>H -> L+7 8.4%,<br>H -> L+6 7.9%         |
| 8  | 5.3285 | 232.68 | 9.80E-04 | H-1 -> L+5 44.5%,<br>H-1 -> L+8 9.8%,<br>H-1 -> L+7 9.3%,<br>H-1 -> L+9 6.7%   |
| 9  | 5.4223 | 228.65 | 0.00158  | H-2 -> L+9 13.7%,<br>H -> L+9 8.8%, ,                                          |
| 10 | 5.5012 | 225.38 | 0.00609  | H -> L+3 16.0%,<br>H-2 -> L+5 11.2%,<br>H -> L+9 11.1%,<br>H -> L+8 8.2%       |
| 11 | 5.6117 | 220.94 | 0.00724  | H-1 -> L+9 11.8%,<br>H -> L+5 9.0%,<br>H-2 -> L+3 8.0%,<br>H -> L 7.6%         |
| 12 | 5.7088 | 217.18 | 0.00313  | H -> L 32.2%,<br>H-2 -> L+6 6.5%,<br>H-2 -> L+5 6.0%                           |

|    |        |        |         |                                                                               |
|----|--------|--------|---------|-------------------------------------------------------------------------------|
|    |        |        |         | , H-1 -> L+9 5.4%                                                             |
| 13 | 5.7351 | 216.18 | 0.00415 | H -> L 15.6%,<br>H-2 -> L+9 14.0%,<br>H -> L+8 8.0%,<br>H -> L+9 5.5%         |
| 14 | 5.7782 | 214.57 | 0.00107 | H -> L 21.4%,<br>H-1 -> L 13.2%,<br>H-2 -> L+5 8.4%,<br>H-1 -> L+9 7.7%       |
| 15 | 5.8014 | 213.71 | 0.00783 | H-1 -> L 48.9%,<br>H -> L+9 7.5%,                                             |
| 16 | 5.8716 | 211.16 | 0.00233 | H-2 -> L 10.1%,<br>H-1 -> L 9.9%,<br>H -> L+6 8.6%,<br>H-2 -> L+8 7.2%        |
| 17 | 5.9113 | 209.74 | 0.00176 | H-2 -> L 48.1%                                                                |
| 18 | 5.9475 | 208.46 | 0.00198 | H -> L+8 22.3%,<br>H -> L+10 9.1%,<br>H -> L 6.4%,<br>H -> L+11 5.2%          |
| 19 | 5.9986 | 206.69 | 0.00693 | H -> L+12 15.0%,<br>H-1 -> L+12<br>12.7%, H-2 -> L<br>11.7%,<br>H-1 -> L 5.7% |

|    |        |        |         |                                                                                     |
|----|--------|--------|---------|-------------------------------------------------------------------------------------|
| 20 | 6.0210 | 205.92 | 0.00505 | H-1 -> L+12<br>29.6%, H -> L+12<br>10.9%,<br>H-2 -> L+12 8.3%,<br>H-1 -> L+10 7.0%  |
| 21 | 6.0585 | 204.65 | 0.01299 | H-1 -> L+8 18.7%,<br>H-1 -> L 7.6%,<br>H-1 -> L+10 7.3%,<br>H-2 -> L 6.5%           |
| 22 | 6.1559 | 201.41 | 0.00602 | H-2 -> L+12<br>42.0%, H-2 -><br>L+10 11.7%, H-2<br>-> L+13 7.5%, H-2<br>-> L+3 6.7% |
| 23 | 6.3132 | 196.39 | 0.12751 | H-2 -> L+8 12.6%,<br>H-2 -> L+2 7.5%,<br>H -> L+12 7.2%,<br>H-2 -> L+17 5.2%        |
| 24 | 6.3370 | 195.65 | 0.00759 | H -> L+14 29.6%,<br>H -> L+16 20.6%,<br>H -> L+13 6.5%, H<br>-> L+20 5.6%           |
| 25 | 6.3712 | 194.6  | 0.012   | H-1 -> L+14<br>28.6%, H-1 -><br>L+16 16.1%, H-1                                     |



|    |        |          |          |                                                                                       |
|----|--------|----------|----------|---------------------------------------------------------------------------------------|
|    |        |          |          | -> L+13 9.5%, H-1<br>-> L+10 5.1%                                                     |
| 26 | 6.3910 | 194      | 0.01192  | H -> L+17 18.8%,<br>H -> L+15 17.7%,<br>H -> L+20 11.0%,<br>H -> L+1 6.9%             |
| 27 | 6.4307 | 192.8    | 0.03991  | H-1 -> L+20<br>16.4%, H-1 -><br>L+17 12.7%, H-1<br>-> L+15 12.7%, H-<br>1 -> L+4 6.2% |
| 28 | 6.4384 | 192.57   | 0.00848  | H-2 -> L+14<br>23.5%, H-2 -><br>L+16 16.0%, H-2<br>-> L+20 13.7%,                     |
| 29 | 6.4651 | 191.77   | 7.90E-04 | H -> L+2 38.5%,<br>H -> L+1 12.9%,<br>H -> L+4 11.5%,<br>H -> L+5 10.2%               |
| 30 | 6.5080 | 190.51   | 0.00217  | H -> L+1 44.1%,<br>H -> L+2 11.5%,<br>H -> L+3 10.9%,<br>H-1 -> L+2 6.5%              |
| 31 | 6.5281 | 189.9200 | 0.0025   | H-1 -> L+2 48.8%,<br>H-1 -> L+5 7.2%,                                                 |

|    |        |          |        |                                                                                |
|----|--------|----------|--------|--------------------------------------------------------------------------------|
|    |        |          |        | H -> L+1 7.2%,                                                                 |
| 32 | 6.5899 | 188.1400 | 0.0003 | H-1 -> L+1 65.2%,<br>H-1 -> L+3 15.1%,                                         |
| 33 | 6.6172 | 187.3700 | 0.0180 | H -> L+21 17.5%,<br>H -> L+19 9.2%,<br>H -> L+4 8.7%,<br>H -> L+2 7.6%         |
| 34 | 6.6307 | 186.9900 | 0.0141 | H-2 -> L+2 48.3%,<br>H-2 -> L+15 6.6%,                                         |
| 35 | 6.6498 | 186.4500 | 0.0269 | H-2 -> L+1 27.9%,<br>H -> L+4 14.1%,<br>H-2 -> L+4 6.0%,<br>H-2 -> L+5 5.8%    |
| 36 | 6.6671 | 185.9600 | 0.0046 | H -> L+4 40.2%,<br>H -> L+21 6.9%,<br>H -> L+3 5.6%,<br>H-2 -> L+1 5.5%        |
| 37 | 6.7060 | 184.8800 | 0.0320 | H-2 -> L+1 30.5%,<br>H-2 -> L+3 9.8%,<br>H-2 -> L+17 5.8%,<br>H-2 -> L+15 5.7% |
| 38 | 6.7317 | 184.1800 | 0.0015 | H-1 -> L+4 52.3%,<br>H-1 -> L+3 9.1%,<br>H-1 -> L+2 8.2%,                      |

|    |        |          |        |                                                                                      |
|----|--------|----------|--------|--------------------------------------------------------------------------------------|
| 39 | 6.7615 | 183.3700 | 0.0217 | H-1 -> L+21<br>16.7%, H-1 -><br>L+18 12.6%, H-1<br>-> L+19 9.1%, H-1<br>-> L+13 6.5% |
| 40 | 6.8207 | 181.7800 | 0.0004 | H-2 -> L+4 46.7%,<br>H-2 -> L+2 9.1%,<br>H-2 -> L+3 8.5%,<br>H-2 -> L+21 7.8%        |
| 41 | 6.8546 | 180.8800 | 0.0055 | H -> L+7 44.9%,<br>H -> L+6 10.1%,<br>H-2 -> L+4 5.2%,                               |
| 42 | 6.8638 | 180.6300 | 0.0070 | H -> L+7 16.5%,<br>H-2 -> L+21<br>12.4%, H-2 -> L+4<br>8.3%,<br>H-2 -> L+19 7.5%     |
| 43 | 6.9322 | 178.8500 | 0.0241 | H-1 -> L+7 29.5%,<br>H-1 -> L+6 10.5%,<br>H-1 -> L+25 7.9%,<br>H-1 -> L+5 5.7%       |
| 44 | 6.9472 | 178.4700 | 0.0088 | H-1 -> L+7 29.5%,<br>H-1 -> L+21 8.1%,<br>H-1 -> L+19 5.6%,<br>H-1 -> L+25 5.4%      |

|    |        |          |        |                                                                                   |
|----|--------|----------|--------|-----------------------------------------------------------------------------------|
| 45 | 7.0144 | 176.7600 | 0.0101 | H-2 -> L+7 36.8%,<br>H-2 -> L+6 10.3%,<br>H-2 -> L+25 8.6%,<br>H-2 -> L+5 7.2%    |
| 46 | 7.0498 | 175.8700 | 0.0639 | H-2 -> L+7 20.4%,<br>H-1 -> L+25<br>19.7%, H-1 -><br>L+18 6.2%,<br>H -> L+25 5.6% |
| 47 | 7.1039 | 174.5300 | 0.0210 | H-2 -> L+25<br>20.0%, H-2 -><br>L+21 5.9%,<br>H -> L+9 5.1%,                      |
| 48 | 7.1153 | 174.2500 | 0.0041 | H -> L+10 17.5%,<br>H -> L+9 14.0%,<br>H-2 -> L+25<br>12.1%, H -> L+8<br>9.7%     |
| 49 | 7.1599 | 173.1700 | 0.0363 | H -> L+10 10.7%,<br>H-2 -> L+25 9.6%,<br>H -> L+25 8.1%,<br>H -> L+11 6.2%        |
| 50 | 7.1882 | 172.4800 | 0.0006 | H -> L+11 18.6%,<br>H-1 -> L+10<br>14.1%, H-1 -> L+9<br>9.7%,                     |

|    |        |          |        |                                                                                   |
|----|--------|----------|--------|-----------------------------------------------------------------------------------|
|    |        |          |        | H -> L+10 9.6%                                                                    |
| 51 | 7.2294 | 171.5000 | 0.0283 | H -> L+11 20.3%,<br>H -> L+25 12.3%,<br>H-1 -> L+10<br>12.3%,                     |
| 52 | 7.2398 | 171.2500 | 0.0106 | H-3 -> L 72.7%,<br>H-3 -> L+1 9.3%, ,                                             |
| 53 | 7.2696 | 170.5500 | 0.0111 | H-1 -> L+11<br>46.0%, H-1 -><br>L+10 14.4%, H-1<br>-> L+17 5.4%,                  |
| 54 | 7.2849 | 170.1900 | 0.0178 | H-2 -> L+10<br>13.6%, H-2 -> L+9<br>12.8%, H-2 -> L+8<br>10.2%,                   |
| 55 | 7.3030 | 169.7700 | 0.0337 | H-5 -> L+3 14.7%,<br>H-2 -> L+10<br>10.8%, H-4 -> L+3<br>9.4%,<br>H-5 -> L+1 5.5% |
| 56 | 7.3058 | 169.7100 | 0.0079 | H-9 -> L 33.8%,<br>H-11 -> L 26.4%,<br>H-7 -> L 8.2%,                             |
| 57 | 7.3617 | 168.4200 | 0.0042 | H-2 -> L+11<br>36.7%, H-2 ->                                                      |

|    |        |          |        |                                                                              |
|----|--------|----------|--------|------------------------------------------------------------------------------|
|    |        |          |        | L+10 16.8%, H-2<br>-> L+17 6.1%,                                             |
| 58 | 7.3743 | 168.1300 | 0.0096 | H -> L+13 13.3%,<br>H -> L+29 13.1%,<br>H -> L+15 10.4%,<br>H -> L+21 7.3%   |
| 59 | 7.3848 | 167.8900 | 0.0372 | H-7 -> L+3 18.4%,<br>H -> L+13 9.3%,<br>H-7 -> L+1 9.2%,<br>H-2 -> L+11 6.0% |
| 60 | 7.4074 | 167.3800 | 0.0248 | H -> L+16 9.0%,<br>H -> L+29 7.7%, ,                                         |
